# Supplementary material for: Mining Grapevine Downy Mildew Susceptibility Genes: A Resource for Genomics-Based Breeding and Tailored Gene Editing
Source: MDPI journal article supplement (doi:10.3390/biom11020181), 2021-01-28
Supplement: s1 [file s1]

**DMR6**

|                            |                                                |    |
|----------------------------|------------------------------------------------|----|
| B.distachyon_Bradi5g19240  | -----MANQLLST---VSCHDTLPEGYARPESDRPRLAE        | 31 |
| O.sativa_Os04g49194        | -----MATTQLLST---VEHRETLPPEGYARPESDRPRLAE      | 32 |
| O.sativa_Os10g39140        | -----MAAEAEQQHQLLST---AVHDTMPGKYVRPESQRPRLDL   | 36 |
| S.bicolor_Sb01g030560      | -----MAEQLLST---AVHDTLPGSYVRPESQRPRLAE         | 30 |
| ZmFNSI-1/ZmDMR6            | -----MAEHLLST---AVHDTLPGSYVRPEPERPRLAE         | 30 |
| B.distachyon_Bradilg77040  | -----MAEQLIST---CAHETLPESYVRDAAERPRLDE         | 30 |
| O.sativa_Os03g03034        | -----MADQLIST---ADHDTLPGNYVRPEAQRPLAD          | 30 |
| S.italica_Si036512m.g      | -----MADQLIST---AVHEELPENYVRPEAQRPLHE          | 30 |
| S.bicolor_Sb01g049030      | -----MAEQLIST---AEHDTLPDSYVRPETQRPLRE          | 30 |
| Z.mays_GRMZM2G475380       | -----MAEHLIST---ADHDLRPDSYVRPETQRPLRE          | 30 |
| A.coerulea_v1.008143m.g    | -----MESSNVLLT---GTRYSNLPENYVRSVSDRPRLSE       | 32 |
| E.salsugineum_TP2g22820    | -----MAAKLIST---GFRHTTLPENYVRPHSDRPRLSE        | 31 |
| C.rubella_006g21660        | -----MAAKLIST---GLRHHTTLPENYVRPISDRPRLSE       | 31 |
| AtDMR6                     | -----MAAKLIST---GFRHTTLPENYVRPISDRPRLSE        | 31 |
| AlDMR6                     | -----MAATLIST---GLRHHTTLPENYVRPISDRPRLSE       | 31 |
| C.sativus_Cucsa.273300     | -----MSSVMEIQLLCS---GGRHEKLPEKYERPESDRPRLSE    | 35 |
| SlDMR6                     | -----METKVISS---GINHSTLPQSYIRPESDRPRLSE        | 31 |
| M.guttatus_mgvla009622m.g  | -----METKV-IS---GVHFSSLPASYIRPESDRPKLSE        | 30 |
| <b>VvDMR6.1</b>            | -----MESKVLST---GIRYLTLPQSYIRPEPERPRLSQ        | 31 |
| C.papaya_16416436          | -----METKVLSS---GVRYENLPENYVRPESERPRLAE        | 31 |
| <b>VvDMR6.2</b>            | -----MDSKVLST---GIPFTTLPENYIRPESERPRLSE        | 31 |
| R.communis_29866.t000021   | -----MDTKVLSS---GIRYSNLPESFIRPESERPRLSE        | 31 |
| M.truncatula_Medtr3g122530 | -----MDTKVLSS---GIHYSKLPESYIRPESDRPCLSQ        | 31 |
| G.max_Glyma04g227900       | -----MDTKVLSS---GVQYSNLPESYIRPESERPRLSE        | 31 |
| G.max_Glyma06g137000       | -----MDIKVLSS---GVQYSNLPESYIRPESERPRLSE        | 31 |
| G.max_Glyma06g14190        | -----MDIKVLSS---GVQYSNLPESYIRPESERPRLSE        | 31 |
| E.grandis_v1_0.018520m.g   | -----MEAKVISG---GTRFTSLPRSYVRPESERPRLSE        | 31 |
| E.grandis_v1_0.018494m.g   | -----MEAKVISG---GTRFTSLPRSYVRPESERPRLFE        | 31 |
| E.grandis_v1_0.018496m.g   | -----MEAKVISG---GTRFTRLPRSYVRPESERPRLSE        | 31 |
| P.persica_ppa008269m.g     | -----METKVLSS---GFKYENLPEGYVRPESERPRLSE        | 31 |
| C.clementina_0.9_015118m.g | -----MDTKVLSS---GIRYTNLPEGYVRPESERPRLSE        | 31 |
| P.persica_ppa022381m.g     | -----MAAKLLSD---LASGVTCVPSNYVRPVHDPRLDQ        | 32 |
| P.persica_ppa019415m.g     | -----MAAKLLSD---LASGVTCVPSNYVRPVHDPRLDQ        | 32 |
| C.clementina_0.9_032642m.g | -----MAAATTKLLLSLSD---LASTVKSVPSNYIRPISDRPNLTE | 36 |
| C.clementina_0.9_012078m.g | -----MAAATTKLLLSLSD---LASTVKSVPSNYIRPISDRPNLTE | 36 |

**DLO**

|                           |                                                |    |
|---------------------------|------------------------------------------------|----|
| B.distachyon_Bradi5g19250 | -----MATAIAKPLLSLSD---LVAESGTVPSSHIRPVGDRPDLAD | 36 |
| O.sativa_Os04g49210       | -----MAPAIAKPLLSLSD---LVAQSGQVPSSHIRPVGDRPDLDN | 36 |
| S.italica_Si010491m.g     | -----MAPTIAKPLLSLSD---LVAQIQGVPLSHVRPVGDRPDLAN | 36 |

|                            |                                                              |    |
|----------------------------|--------------------------------------------------------------|----|
| S.bicolor_Sb06g026350      | -----MAPAISKPLLSL-LVAQIGKVPSSHIRPVGDRPDLAN                   | 36 |
| Z.mays_GRMZM2G050234       | -----MAPAISKPLSLD-LVAQIGKVPSSHIRPVGDRPDLAN                   | 36 |
| G.max_Glyma03g42250        | -----MAEKLVLVSD-MASTMKQVPSNFIRPLGDRPNLQG                     | 34 |
| G.max_Glyma16g01990        | -----MATTKPLSLD-LASTVDRVPSNFIRPIGDRPNLQQ                     | 34 |
| G.max_Glyma07g05420        | -----MAATKPLSLD-LASTIDRVPSNFIRPIGDRPKLHQ                     | 34 |
| <b>VvDLO1</b>              | -----MANAKLLSLD-LASSIDCVPSRYVRPVNDRPNLDE                     | 34 |
| R.communis_30076.t000026   | -----MAIAKPLSLD-LVSTITSVPSNFIRPLSDRPNFNE                     | 34 |
| AlDLO1                     | -----MATSATSKLLVSD-FDSSVSHIPSNYVRPILDRPNLSE                  | 37 |
| AtDLO1                     | -----MATSATSKLLVSD-FASS-VHIPSNYVRPISDRPNLSE                  | 36 |
| AlDLO2                     | -----MAASATSKLLVSD-IASVVDHVPSNYVRPVSDRPNMSE                  | 37 |
| AtDLO2                     | -----MAASKLLVSD-IASVVDHVPSNYVRPVSDRPKMSE                     | 34 |
| C.sativus_Cucsa.193360     | -----MSASGHTKLLVTD-LAATVQQVPSRYVRPISDRPNSSD                  | 37 |
| C.papaya_evm.TU.sup_37.106 | -----MAATKLLSLD-LASNLIKQVPAKYIQPISDRPNLAD                    | 34 |
| E.grandis_v1_0.017927m.g   | -----MATAATKLLSLD-RVPGINRVPSNYIRPQADRPNLTE                   | 36 |
| E.grandis_v1_0.017897m.g   | -----MATAATKLLSLD-RVPGINRVPSNYIRPEADRPNLTE                   | 36 |
| E.grandis_v1_0.047536m.g   | MLTSAAQINTMTSYSALGRRFGENEKTAAKLLSLD-LASGIDRVPDNYIRSEADRPNLTE | 59 |
| E.grandis_v1_0.017895m.g   | -----MAPAAAKVLLTD-LASGIDRVPDNYIRSEADRPNLTE                   | 36 |
| E.grandis_v1_0.017876m.g   | -----MAPAAAKVLLTD-LASGIDRVPDNYIRSEADRPNLTD                   | 36 |
| E.grandis_v1_0.015926m.g   | -----MAPAAAKVLLTD-LASGIDRVPDNYIRSEADRPNLTE                   | 36 |
| <b>VvDLO2 (V2D)</b>        | -----MVPSTTKLLSLD-MVLGVDHVPSNYVRPPSERPNFKD                   | 36 |
| C.clementina_0.9_014263m.g | -----MSAAATTATKLLSLD-LAPTLTNVPSDYIRPISDRPSLTD                | 39 |
| P.persica_ppa008100m.g     | -----MATATKLLSLD-LMSGVNHVPSNYVRPISDRPNLSD                    | 35 |
| P.persica_ppa008091m.g     | -----MATATKLLSLD-LMSGVNHVPSNYVRPISDRPNLSD                    | 35 |
| R.communis_30068.t000102   | -----MAS-TKLLSLADL-ASGVHRVPSKYIRPVSDRPNLSD                   | 34 |
| M.esculenta_4.1_029834m.g  | -----MAF-SKPLSLADLSSLGVKNVPSSYIRPISDRPNLSD                   | 35 |

:



**DMR6**

|                            |                                                                |    |
|----------------------------|----------------------------------------------------------------|----|
| B.distachyon_Bradi5g19240  | VA--TDSNIPLIDLAS--P-DKLRVIAEIDRACRTYGGFFQVINHGISEELLEKVMAGLE   | 86 |
| O.sativa_Os04g49194        | VA--TDSNIPLIDLAS--P-DKPRVIAEIAQACRTYGGFFQVTNHGIAEELLEKVMVALE   | 87 |
| O.sativa_Os10g39140        | VV--SDARIPVVDLAS--P-DRAAVVSAVGDACRTHGFFQVNVHGI DAALIASVMEVGRE  | 91 |
| S.bicolor_Sb01g030560      | VV--TGARIPVVDLGS--P-DRAAVVAAIGDACRSHGFFQVLNHGVHADLVAAVMAVGRA   | 85 |
| ZmFNSI-1/ZmDMR6            | VV--TGARIPVVDLGS--P-DRGAVVAAVGDACRSHGFFQVNVHGIHAALVAAVMAAGRG   | 85 |
| B.distachyon_Bradilg77040  | VV--PDAHIPVVDLAH--P-DRAAIVSQIGAACRSHGFFQVLNHGLPAELMEAMAVAHE    | 85 |
| O.sativa_Os03g03034        | VL--SDASIPVVDLAN--P-DRAKLVSQVGAACRSHGFFQVLNHGVPVELTSLVLAHAHD   | 85 |
| S.italica_Si036512m.g      | VV--SDAQIPVVDLAD--P-DPAAVVASIGEACTTHGFFQVLNHGVPVELMVAMLAVAYE   | 85 |
| S.bicolor_Sb01g049030      | VV--PDAEIPVVDLAV--P-DRAAVVARVAEACRTHGFFQVNVHGVAEELTAAMLAVAYE   | 85 |
| Z.mays_GRMZM2G475380       | VV--PDAEIPVVDLAD--P-DREAVVARVAEACRTHGFFQVLNHGVPEQLTAAMMSVAYE   | 85 |
| A.coerulea_v1.008143m.g    | VK--DCENVPVIDLSV--A-DESLLAQQIGNACKSHGFFQVINHGVNSELVEKMMESISHE  | 87 |
| E.salsugineum_TP2g22820    | VS--QLEDFFPLIDLSS--T-DRSRLIQQIHQACARFGFFQVINHGVSKERIDEMVSVANE  | 86 |
| C.rubella_006g21660        | VS--QLEDFFPLIDLSS--S-DRSLLVQQTHQACARFGFFQVTNHGVSKQVIDDMVSAHE   | 86 |
| AtDMR6                     | VS--QLEDFFPLIDLSS--T-DRSFLIQQIHQACARFGFFQVINHGVNKQIIDEMVSVARE  | 86 |
| AlDMR6                     | VS--QLEDFFPLIDISS--T-DRSVLVQQIHQACARFGFFQVINHGVSKQLIDEMVSAHE   | 86 |
| C.sativus_Cucsa.273300     | VC--CWDKVPIDDLGC--E-EREMIVKQVEEACKSYGFFQVINHGVVRKELVEKVIEVGKQ  | 90 |
| SlDMR6                     | VV--DCENVPIIDLSC--G-DQAQIIRQIGEQTYGFFQVINHGVPKVEVVEKMLGVAGE    | 86 |
| M.guttatus_mgvla009622m.g  | IE--EFDNVPIIDLGC--E-DHNLIVKQIGDACREYGGFFQVINHGVSKALVDNLCVAHE   | 85 |
| VvDMR6.1                   | VS--ECKHVPIIDLK--DVNRAQLIQHIADACRLYGFFQVINHGVAAEMMEKMLEVADE    | 87 |
| C.papaya_16416436          | VS--ACQNVPVVDLGC--D-DRTQIIQQISDACKDFGFFQVINHGVSEETRDGMIGVAKE   | 86 |
| VvDMR6.2 (E53G)            | IA--DCENVPIIDLSC--D-DRAQIIEQLADACSYGFFQVINHGVSAEAEKMLHVANE     | 86 |
| R.communis_29866.t000021   | VL--ACDNVPIVDLGC--E-DGAQVVQQIGYACSNYGFFQVINHKVPDEVVADMLLVASE   | 86 |
| M.truncatula_Medtr3g122530 | VS--EFENVPIIDLGS--H-NRTQIVQQIGEQSSYGFFQVNVHGVPLEELKKTAEVAYD    | 86 |
| G.max_Glyma04g227900       | VS--ECEDVPIIDLGC--Q-NRAQIVHQIGEQACNYGFFQVINHGVVALEAAKEMAEVAHG  | 86 |
| G.max_Glyma06g137000       | VS--ECEDVPIIDLGS--Q-NRAQIVHQIGEQACNYGFFQVINHGVVALEAAKEMEVAHG   | 86 |
| G.max_Glyma06g14190        | VS--ECEDVPIIDLGS--Q-NRAQIVHQIGEQACNYGFFQVINHGVVALEAAKEMEVAHG   | 86 |
| E.grandis_v1_0.018520m.g   | VS--AFEHVPIIDLGC--N-DRSQVVRQVGDACRVYGGFFQVINHGVSTEAVERMQEVAAE  | 86 |
| E.grandis_v1_0.018494m.g   | VS--AFEHVPIIDLGC--N-DRSRVVRQVGDACRVYGGFFQVINHGVSTEAVERMQEVAAE  | 86 |
| E.grandis_v1_0.018496m.g   | VS--AFEHVPIIDLGC--N-DRSRVVHQVGDACRVYGGFFQVINHGVSTEAVERMQEVAAE  | 86 |
| P.persica_ppa008269m.g     | VS--ECKNIPVINLAS--E-NRAETVQQVGDACKSYGFFQVINHGVSTEAVEKMLGTATE   | 86 |
| C.clementina_0.9_015118m.g | VS--ECENVPVIDLAC--D-DRSLIVQQVADACKNYGFFQAINHEVPLETVERVIEVAKE   | 86 |
| P.persica_ppa022381m.g     | VQPS-DHSIPLINLRGFDGSRHEIINQIGLACQNYGFFQVQNHAEIEVVIDNMLKVARE    | 91 |
| P.persica_ppa019415m.g     | VQPS-DHSIPLINLHGFDSRRHEIINQIGLACQNYGFFQVQNHAEIEAVIDNMLKVARE    | 91 |
| C.clementina_0.9_032642m.g | -VQISDGSIPLIDLQVLDGPRRLDIKQIGQACQHDGVFQVKNHGIPETIINSMLSITRA    | 95 |
| C.clementina_0.9_012078m.g | -VQISDGSIPLVDLQVLNGPSRLDTIKQIGQACQHDGFFQVKNHGIPETIINNMLTIARA   | 95 |
| DLO                        |                                                                |    |
| B.distachyon_Bradi5g19250  | VDHESGAGIPLIDLKHLDPERRRVVEAIGSACETDGGFFMVTNHGIPEAVVEGMLRVAKE   | 96 |
| O.sativa_Os04g49210        | VDHESGAGIPVIDLKQLDGPDRRKVVVEAIGSACETDGGFFMVKNHGIPEEVVEGMLRVARE | 96 |
| S.italica_Si010491m.g      | VDNESGAGIPLIDLKKLNGPQRRVVEAIGRACGSDGFFMVTNHGIPAGVVEGMLRVARE    | 96 |

|                            |                                                                |     |
|----------------------------|----------------------------------------------------------------|-----|
| S.bicolor_Sb06g026350      | VDNESGAGIPLIDLKMLNGPERRKVVEAIGRACESDGGFFMVTNHGIPAAVVEGMLRVARE  | 96  |
| Z.mays_GRMZM2G050234       | VDNESGAGIPLIDLKKLNGPERRKVVEAIGKACESDGGFFMVTNHGIPAAVVEGMLRVARE  | 96  |
| G.max_Glyma03g42250        | VVQSSDVCIPLIDLQDLHGPNRSHIIQQIDQACQNYGFFQVTNHGVPEGVIEKIMKVTR    | 94  |
| G.max_Glyma16g01990        | LHSS-IASIPIDLDLQGLGGSNHSQIIQNIHACQNYGFFQIVNHGIPPEVVS KMVNVSKE  | 93  |
| G.max_Glyma07g05420        | LHSS-LASIPIDLDLQGLGGSNHSQIIQNIHACQTYGFFQIVNHGIQEEVVS KMVNVSKE  | 93  |
| <b>VvDLO1 (H52L)</b>       | VQSSLDGSIPLIDLQDLHGPNRSHVVIKQIAEACQIDGFFRVKNHGIPESVIHGMLSITKE  | 94  |
| R.communis_30076.t000026   | VIQTSDCSIPLIDLQGLDGPLRSTLVKEIGQACQGYGFFQVKNHGIPEDVIDKMLSVSRE   | 94  |
| AlDLO1                     | V-ESSSDSIPLIDLRELHGPNRAEVVQQLDSACSTYGFFQIKNHGVPDTTVDKMLTVARE   | 96  |
| AtDLO1                     | V-ESSGDSIPLIDLRLDHGPNRAVIVQQLASACSTYGFFQIKNHGVPDTTVNKMQTVARE   | 95  |
| AlDLO2                     | V-ETFGDSIPLIDLQDLHGPNRANIINQFAHACSSYGFFQIKNHGVPEEIIKQMMNVGRE   | 96  |
| AtDLO2                     | V-QTSGDSIPLIDLHDLHGPNRADIINQFAHACSSCGFFQIKNHGVPEETIKKMMNAARE   | 93  |
| C.sativus_Cucsa.193360     | VRPSNTYSFSSVIDLHALDGPSRPDVIYQIRRACERDGGFFLVKNHGVPEEMINGVMRITRE | 97  |
| C.papaya_evm.TU.sup_37.106 | VEISELSSSIPLIDLEGLDGPNRRSEIINQIAQACELHGFFQVKNHGVPEEMINGILRLARE | 94  |
| E.grandis_v1_0.017927m.g   | VEASDASTIPLIDLQGLFGPNRDDIIRQIGKACQDGGFFQIKNHGIPPEVVQAIMNIAGE   | 96  |
| E.grandis_v1_0.017897m.g   | VEASDASTIPLIDLQGLFGPNRDDIIRLIGEACQDGGFFQIKNHGIPPEVVQAIMNIAGE   | 96  |
| E.grandis_v1_0.047536m.g   | VEASDASYIPLVDLQGLSGPNRDDIIRQIGRACQDGGFFQIKNHGIPPEKVQAIMNIARE   | 119 |
| E.grandis_v1_0.017895m.g   | VEASDASSIPLVDLQGLSGPNRDDIIRQIGRACQDGGFFQIKNHGIPPEKVQAIMNIARE   | 96  |
| E.grandis_v1_0.017876m.g   | VEASDASSIPLVDLQGLSGPNRDDIIRQIGRACQDGGFFQIKNHGIPPEKVQAIMNIARE   | 96  |
| E.grandis_v1_0.015926m.g   | VEASDASSIPLVDLQGLSGPNRDDIIRQIGRACQDGGFFQIKNHGIPPEKVQAIMNIARE   | 96  |
| <b>VvDLO2</b>              | -VQASDVSIPLIDLQDLQGPGRPDVVKQIGQACQHSQFFQIQNHGVSETMISNILRLARD   | 95  |
| C.clementina_0.9_014263m.g | QTHISDGSIPLIDLQGLNGPNRRSDIIRQIGQACQHCQFFQVKNHGISEAMINMMLSIART  | 99  |
| P.persica_ppa008100m.g     | -VQISDASIPLIDLKDLHGHNHSNIIKQIGLACQTDGFFQVKNHGVPEEMIKDMLSIARE   | 94  |
| P.persica_ppa008091m.g     | -VQISDASIPLIDLKDLHGHNHSNIIKQIGLACQTDGFFQVKNHGVPEEMIKDMLSIARE   | 94  |
| R.communis_30068.t000102   | -VHKSDGSIRLIDLKGLRSPNRALVIKQIGQACQTDGFFQVKNHGLPDEMINSIMRTARE   | 93  |
| M.esculenta_4.1_029834m.g  | -VEMSDAAIPLIDLQGLYGNHSLVIAQIGRACQFDGFFQVKNHGIPEDVIDTILHTGTD    | 94  |

. : : : :

\*\* \* . \* \*\* :

**DMR6**

|                            |                                                                |     |
|----------------------------|----------------------------------------------------------------|-----|
| B.distachyon_Bradi5g19240  | FFRLPPPEEKAKLYSDEPSKKIRLSTSFNVRKETVHNWRDYLRLHCHPLEEFVFPDWPSNPP | 146 |
| O.sativa_Os04g49194        | FFRLPPPEEKAKLYSDEPSKKIRLSTSFNVRKETVHNWRDYLRLHCHPLEEFVPEWPSNPA  | 147 |
| O.sativa_Os10g39140        | FFRLPAEEKAKLYSDDPAKKIRLSTSFNVRKETVHNWRDYLRLHCHPLHQFVPDWPSNPP   | 151 |
| S.bicolor_Sb01g030560      | FFRLSPPEEKAKLYSDDPARKIRLSTSFNVRKETVHNWRDYLRLHCHPLDEFVPDWPSNPP  | 145 |
| ZmFNSI-1/ZmDMR6            | FFRLPPPEEKAKLYSDDPARKIRLSTSFNVRKETVHNWRDYLRLHCHPLDEFVLPDWPSNPP | 145 |
| B.distachyon_Bradilg77040  | FFRLSPPEEKAKLYSDDPAKKIRLSTSFNVRKETVHNWRDYLRLHCHPLEQFVPDWPSNPS  | 145 |
| O.sativa_Os03g03034        | FFRLPAEEKAKLYSDDPAKKIRLSTSFNVRKETVHNWRDYLRLHCHPLHRYLPDWPSNPP   | 145 |
| S.italica_Si036512m.g      | FFRLPAEEKAKLYSDDPGKKMRLSTSFNVRKETVHNWRDYLRLHCHPLEQYVPDWPANPP   | 145 |
| S.bicolor_Sb01g049030      | FFRLPAEEKAKLYSDDPGKKMRLSTSFNVRKETVHNWRDYLRLHCHPLEQYVPDWPDNPP   | 145 |
| Z.mays_GRMZM2G475380       | FFRLPAEEKAKLYSDDPAKKMRLSTSFNVRKETVHNWRDYLRLHCHPLEQYVPDWPDNPP   | 145 |
| A.coerulea_v1.008143m.g    | FFHLPLDVKMQFYSDDPKTMRLSTSFNLKKESVHNWRDYLRLHCHPIEKYVQEWPSVPS    | 147 |
| E.salsugineum_TP2g22820    | FFSMTMEEEKMKLYSDDPTKTTRLSTSFNVKKEEVNWRDYLRLHCHPLHKYVHEWPSNPP   | 146 |
| C.rubella_006g21660        | FFSMSMEEEKMKLYSDDPTKTTRLSTSFNVKKEEVNWRDYLRLHCHPIHKYVHEWPSKPP   | 146 |
| AtDMR6                     | FFSMSMEEEKMKLYSDDPTKTTRLSTSFNVKKEEVNWRDYLRLHCHPIHKYVNEWPSNPP   | 146 |
| AlDMR6                     | FFSMSMEEEKMKLYSDDPTKTTRLSTSFNVKKEEVNWRDYLRLHCHPIHKYVHEWPSNPP   | 146 |
| C.sativus_Cucsa.273300     | FFELPMEEEKLKFYSDDPSKTVRLSTSFNVRKEQFNWRDYLRLHCHPLSNYTPHWPSNPP   | 150 |
| SlDMR6                     | FFNLVPVEEKLKLYSDDPSKTMRLSTSFNVKKEVHNWRDYLRLHCHPLEKYAPEWPSNPS   | 146 |
| M.guttatus_mgvla009622m.g  | FFDLVSVEEKMKLYSDDPTKTMLRLSTSFNVKKEVHNWRDYLRLHCHPLEKYVPEWPSNPS  | 145 |
| VvDMR6.1 (Y89H)            | FFVRLPVEEKMKLYSDDPTKTMLRLSTSFNVNKEKVHNWRDYLRLHCHPLDQYTPWPSNPP  | 147 |
| C.papaya_16416436          | FFSLPMEEEKMKIYSDDPAKTTRLSTSFNVKKEKVHNWRDYLRLHCHPLHKYMPWESSPP   | 146 |
| VvDMR6.2                   | FFQLPVEEKMKLYSDDPSKTMRLSTSFNVKKEKVHNWRDYLRLHCHPLEQYMPWPSNPP    | 146 |
| R.communis_29866.t000021   | FFKLPLEEKLKIYSDDPTKTMLRLSTSFNMKKEKVHNWRDYLRLHCHPLDKYISEWPSDPP  | 146 |
| M.truncatula_Medtr3g122530 | FFKLVPVEEKMKLYSDDPTKTMLRLSTSFNVNKEEVHNWRDYLRLHCHPLDNYVPEWPSNPP | 146 |
| G.max_Glyma04g227900       | FFKLVPVEEKLKLYSEDPSKTMRLSTSFNVKKEVHNWRDYLRLHCHPLDKYAPEWPSNPP   | 146 |
| G.max_Glyma06g137000       | FFKLVPVEEKLKLYSEDTSKTMRLSTSFNVKKEVNRDYLRLHCHPLEKYAPEWPSNPP     | 146 |
| G.max_Glyma06g14190        | FFKLVPVEEKLKLYSEDTSKTMRLSTSFNVKKEVNRDYLRLHCHPLEKYAPEWPSNPP     | 146 |
| E.grandis_v1_0.018520m.g   | FFRLPVEEKMKLYSEDPTKTMLRLSTSFNVKKEKVHNWRDYLRLHCHPLEKYMEEWANPP   | 146 |
| E.grandis_v1_0.018494m.g   | FFRLPEEEKMKLYSEDPTKTMLRLSTSFNVKKEKVHNWRDYLRLHCHPLEKYMEEWANPP   | 146 |
| E.grandis_v1_0.018496m.g   | FFRLPVEEKMKLYSEDPTKTMLRLSTSFNVKKEKVHNWRDYLRLHCHPLEKYMEEWANPP   | 146 |
| P.persica_ppa008269m.g     | FFSLPVEEKMKLYSDDPSKTMRLSTSFNVKKEKVHNWRDYLRLHCHPLEKYVPEWPSNPS   | 146 |
| C.clementina_0.9_015118m.g | FFNLVPVEEKLKLYSDDPSKTMRLSTSFNVNKEKVHNWRDYLRLHCHPLDKYVPEWPSNPS  | 146 |
| P.persica_ppa022381m.g     | FFHLPEERLKCFSDDPLKTTRLSTSFNVKTEKVSSWRDYLRLHCHPLEDYMHEWPSNPP    | 151 |
| P.persica_ppa019415m.g     | FFHLPEERLKCFSDDPLKTTRLSTSFNVKTEEVSSWRDYLRLHCHPLEDYMHEWPSNPP    | 151 |
| C.clementina_0.9_032642m.g | FFKLPEERLKSYSDDPSKSTRLSTSFVNTEKVSNSWRDYLRLHCHPLQDYIHEWPSNPP    | 155 |
| C.clementina_0.9_012078m.g | FFKLPEERLKSYSDDPSKSTRLSTSFVNTEKISNSWRDYLRLHCHPLQDYMHEWPSNPP    | 155 |

**DLO**

|                           |                                                              |     |
|---------------------------|--------------------------------------------------------------|-----|
| B.distachyon_Bradi5g19250 | FFHLPEERLKCYSDDPKAIRLSTSFNVRTEKVSNSWRDYLRLHCHPLQSFIDQWPSNPP  | 156 |
| O.sativa_Os04g49210       | FFHMPESERLKCYSDDPKAIRLSTSFNVRTEKVSNSWRDYLRLHCHPLESFIDQWPSNPP | 156 |
| S.italica_Si010491m.g     | FFHMPESERLKCYSDDPKAIRLSTSFNVRTEKVSNSWRDYLRLHCHPLESFIEQWPSNPP | 156 |



|                            |                                                                 |     |
|----------------------------|-----------------------------------------------------------------|-----|
| S.bicolor_Sb06g026350      | FFHLPESEERLKCYSDDPKKAIRLSTSFNVRTKVNWRDFLRLHCYPLESFVDQWPSNPP     | 156 |
| Z.mays_GRMZM2G050234       | FFHLPESEERLKCYSDDPNKAIRLSTSFNVRTKVSNNWRDFLRLHCYPLQSFVDQWPSNPP   | 156 |
| G.max_Glyma03g42250        | FFGLPESEKLSYSTDPFKASRLSTSFNVNSEKVSNNWRDFLRLHCHPIEDYIKWPSNPP     | 154 |
| G.max_Glyma16g01990        | FFGLPESEERLKNYSDDPTKTTRLSTSFNVKTEKVSNNWRDFLRLHCHPLEDYIQEWPGNPP  | 153 |
| G.max_Glyma07g05420        | FFGLPESEERLKNSDDPSKTTRLSTSFNVKTEKVSNNWRDFLRLHCHPLEDYIQEWPGNPP   | 153 |
| <b>VvDLO1</b>              | FFHLPESEERLKNYSDDPLKTMRLSTSFNVKTEQVSNNWRDFLRLCYCPLYEDYIQEWPSNPP | 154 |
| R.communis_30076.t000026   | FFHLPESEERMKNYSDDPMRTRLSTSFNVRTKTSNWRDFLRLHCYPLDDYMQEWPTNPP     | 154 |
| AlDLO1                     | FFHQPESEERVKHYSADPTKTTRVSTSFNIGADKILNWRDFLRLHCFPIEDFIEEWPSSPN   | 156 |
| AtDLO1                     | FFHQPESEERVKHYSADPTKTTRLSTSFNVGADKVLNWRDFLRLHCFPIEDFIEEWPSSPI   | 155 |
| AlDLO2                     | FFHQSESEERVKHYSADTKKTTRLSTSFNVSKKVSNNWRDFLRLHCYPIEDFIHEWPSTPV   | 156 |
| AtDLO2                     | FFRQSESEERVKHYSADTKKTTRLSTSFNVSKKVSNNWRDFLRLHCYPIEDFINEWPSTPI   | 153 |
| C.sativus_Cucsa.193360     | FFRLPESEERLKSYSDDPTKKTRLSTSFNVKTEKVNWRDFLRLHCYPLHLYVDEWPSNPP    | 157 |
| C.papaya_evm.TU.sup_37.106 | FFRLPESEERLENYSDDPAKTTRLSTSFNVKTEKFSNWRDFLRLHCYPVQDYIHEWPTNPP   | 154 |
| E.grandis_v1_0.017927m.g   | FFRLPESEERLKNYSDDPSKSTRLSTSFNIKTEKVSNNWRDFLRLHCYPLEEYMHWPSTNPP  | 156 |
| E.grandis_v1_0.017897m.g   | FFRLPESEERLKNYSDDPSKSTRLSTSFNIKTEKVSNNWRDFLRLHCYPLEEYMHWPSTNPP  | 156 |
| E.grandis_v1_0.047536m.g   | FFHLPESEERLKNYSDDPTKSTRLSTSFNLKTEKVSNNWRDFLRLHCYPLEEYMHWPSTNPP  | 179 |
| E.grandis_v1_0.017895m.g   | FFHLPESEERLKNYSDDPTKSTRLSTSFNLKTEKVSNNWRDFLRLHCYPLEEYMQEWPTNPP  | 156 |
| E.grandis_v1_0.017876m.g   | FFQLPESEERLKNYSDDPTKSTRLSTSFNLKTEKVSNNWRDFLRLHCYPLEEYMHWPSTNPP  | 156 |
| E.grandis_v1_0.015926m.g   | FFRLPESEERLKNYSDDPTKSTRLSTSFNLKTEKVSNNWRDFLRLHCYPLEEYMHWPSTNPP  | 156 |
| <b>VvDLO2</b>              | FFQLPESEERLKNYSDNPSNPVRLSTSFNVKTEKVNWRDFLRLHCYPLEDYVHQWPSNPP    | 155 |
| C.clementina_0.9_014263m.g | FFKLPESEERLKIYSDDPSKPTTRLSTSFNVKTEKVSNNWRDFLRLHCYPLQDYVHDWPLNPP | 159 |
| P.persica_ppa008100m.g     | FFKLPESEERLKMYSDDPSKTTRLSTSFNVRTKLSNWRDFLRLHCYPLEDYVQEWPNPP     | 154 |
| P.persica_ppa008091m.g     | FFKLPESEERLKMYSDDPSKTTRLSTSFNVRTKLSNWRDFLRLHCYPLEDYVQEWPNPP     | 154 |
| R.communis_30068.t000102   | FFKLPESEERLKCYSDNPTKTTRLSTSFNVKTEKVSNNWRDFLRLHCYPLADYIQEWPCNPP  | 153 |
| M.esculenta_4.1_029834m.g  | FFKLPESEERLKSYSDDPAKTTRLSTSFNVKTEKFSNWRDFLRLHCYPVEDYIQEWPSNPP   | 154 |

\*: . : : : \* : \*:\*\*\*\*\*: : .\*\*\*:\*\*\*:\*.\*: : .\*\* \*



**DMR6**

|                            |                                                                  |                |     |
|----------------------------|------------------------------------------------------------------|----------------|-----|
| B.distachyon_Bradi5g19240  | AF-KEIISTYCR <b>EVRL</b> LGLRLMGAISLSLGLDENYVEN-VLG----          | EQEQHMAVNYYPPC | 200 |
| O.sativa_Os04g49194        | QF-KEIMSTYCR <b>EVRL</b> LGLRLLGAISSVSLGLEEDYIEK-VLG----         | EQEQHMAVNYYPPC | 201 |
| O.sativa_Os10g39140        | SF-KEIIGTYCT <b>EVREL</b> GFRLYEAISESLGLEGGYMR-TLG----           | EQEQHMAVNYYPPC | 205 |
| S.bicolor_Sb01g030560      | DF-KDTMSTYCK <b>EVREL</b> GFRLYAAISESLGLEASYMKE-TLG----          | EQEQHMAVNYYPPC | 199 |
| ZmFNSI-1/ZmDMR6            | DF-KETMGTYCK <b>EVREL</b> GFRLYAAISESLGLEASYMKE-ALG----          | EQEQHMAVNYYPPC | 199 |
| B.distachyon_Bradilg77040  | AF-REVMSTYCK <b>EIRE</b> LGFRLYAAISESLGLEEDYMKK-VLG----          | EQEQHMAVNYYPPC | 199 |
| O.sativa_Os03g03034        | SF-REIISTYCK <b>EVREL</b> GFRLYGAISESLGLEQDYIKK-VLG----          | EQEQHMAVNYYPPC | 199 |
| S.italica_Si036512m.g      | SF-REIVSAYC <b>REVR</b> ALGFRLYEAISASLGLEDDYVKK-TLG----          | EQEQHMAVNYYPPC | 199 |
| S.bicolor_Sb01g049030      | SF-RETVSAYC <b>REVR</b> ALGFRLYGAISEGLDLGVIYKE-TLG----           | EQEQHMAVNYYPPC | 199 |
| Z.mays_GRMZM2G475380       | SF-RRTVSAYCS <b>AVREL</b> GFRLYVAISEGLGLDGAYIKE-ALG----          | EQEQHMAVNYYPPC | 199 |
| A.coerulea_v1.008143m.g    | TF-KDVVATYCK <b>EVRL</b> LGLRLLGSISSLGLEEDYIEK-VLG----           | DQGQHMAVNYYPPC | 201 |
| E.salsugineum_TP2g22820    | SF-KEIVSKYSR <b>QVR</b> DVGCTIEELISESLGLEKDYMKK-VLG----          | EQGQHMAINYYPPC | 200 |
| C.rubella_006g21660        | SF-KEVVS <b>KYSRE</b> VEVGFNIEELISESLGLEKDYLLK-VLG----           | EQGQHMAVNYYPPC | 200 |
| AtDMR6                     | SF-KEIVSKYS <b>REVR</b> EVGFKEIEELISESLGLEKDYMKK-VLG----         | EQGQHMAVNYYPPC | 200 |
| AlDMR6                     | SF-KEIVSKYS <b>REVR</b> EVGFKEIEELISESLGLEKDYMKK-VLG----         | EQGQHMAVNYYPPC | 200 |
| C.sativus_Cucsa.273300     | SF-REIVSSYC <b>NEVR</b> KVGYRIEELISESLGLEKEYIRK-KLG----          | EQGQHMAINYYPPC | 188 |
| SlDMR6                     | SF-REIVS <b>RYC</b> REIRQLGFRLLEEAIAESLGLDKCEIKD-VLG----         | EQGQHMAINYYPPC | 200 |
| M.guttatus_mgvla009622m.g  | SF-KDVVSTYCA <b>EIR</b> QLGLRLQEDISESLGLDKDNLKN-VLG----          | DQGQHMAVNYYPPC | 199 |
| VvDMR6.1                   | SF-KEIVSSYC <b>KEVR</b> ELGFRLQEMISESLGLEKDHKN-VFG----           | EQGQHMAVNYYPPC | 201 |
| C.papaya_16416436          | SF-KEVVS <b>KYSIE</b> VR <b>ELGL</b> RIEELISESLGLDKDLIRN-VVG---- | EQGQHMAVNYYPPC | 200 |
| VvDMR6.2                   | EF-KDTSNYC <b>VEVR</b> QLGHRLEEAIGESLGLEKDYIRN-TLG----           | EQGQHMAVNYYPPC | 200 |
| R.communis_29866.t000021   | LF-KEIVS <b>RYCIE</b> VRKLGFRLQELISESLGLPKDHIRN-VLG----          | EQGQHMAVNYYPPC | 200 |
| M.truncatula_Medtr3g122530 | SF-KETVANYC <b>KEVR</b> ELGLRIEYISESLGLEKDYLRN-ALG----           | EQGQHMAVNYYPPC | 200 |
| G.max_Glyma04g227900       | SF-KETVTEYCT <b>LVREL</b> GLRIQEIYISESLGLEKDYIKN-VLG----         | EQGQHMAVNYYPPC | 200 |
| G.max_Glyma06g137000       | SF-KETVTEYCT <b>IIRE</b> LGLRIQEIYISESLGLEKDYIKN-VLG----         | EQGQHMAVNYYPPC | 200 |
| G.max_Glyma06g14190        | SF-KETVTEYCT <b>IIRE</b> LGLRIQEIYISESLGLEKDYIKN-VLG----         | EQGQHMAVNYYPPC | 200 |
| E.grandis_v1_0.018520m.g   | TF-KEFVSNYC <b>REVR</b> LGRLLEELISESLGLEKDAVRN-ILG----           | EQGQHMAVNYYPPC | 200 |
| E.grandis_v1_0.018494m.g   | TF-KEFVSNYC <b>REVR</b> LGRLLEELISESLGLEKDAVRN-ILG----           | EQGQHMAVNYYPPC | 200 |
| E.grandis_v1_0.018496m.g   | TF-KEFVSNYC <b>REVR</b> LGRLLEELISESLGLEKDAVRN-ILG----           | EQGQHMAVNYYPPC | 200 |
| P.persica_ppa008269m.g     | SF-KDIVS <b>KYSEE</b> VR <b>ELGL</b> QELISESLGLEKDYIKS-TLG----   | EQGQHMAVNYYPPC | 200 |
| C.clementina_0.9_015118m.g | TF-KEFVSTYCS <b>EVRL</b> GLGYRVLELISESLGLEKDYIKK-VLG----         | EQGQHMAVNYYPPC | 200 |
| P.persica_ppa022381m.g     | SF-REDVAEYCN <b>VKGL</b> AERLLEAISESLGLEKDYMR-ALG----            | KHQQHMAINYYPPC | 205 |
| P.persica_ppa019415m.g     | SF-REDVAEYCN <b>VKGL</b> AERLLEAISESLGLEKDYMR-ALG----            | KHQQHMAINYYPPC | 205 |
| C.clementina_0.9_032642m.g | SF-RYN-----YARGLVLRLLLEAISESLGLQRDYIDK-ALG----                   | KHQQHMAINYYPPC | 203 |
| C.clementina_0.9_012078m.g | SV-REVVAEYCT <b>SVR</b> GLVLRLLLEAISESLGLQDFIDK-ALG----          | KHQQHMAINYYPPC | 209 |

**DLO**

|                           |                                                      |                |     |
|---------------------------|------------------------------------------------------|----------------|-----|
| B.distachyon_Bradi5g19250 | AF-REVVGAYST <b>EARAL</b> RLLEAISESLGLERRHMT-AMG---- | GHAQHMAVNYYPPC | 210 |
| O.sativa_Os04g49210       | SF-RQVVGTY <b>SREAR</b> ALRLLEAISESLGLERGHMV-AMG---- | RQAQHMAVNYYPPC | 210 |
| S.italica_Si010491m.g     | SF-REVVGTY <b>ATEAR</b> ALRLLEAISESLGLERSHMA-AMG---- | RQAQHMAVNYYPPC | 210 |

|                            |                                                               |     |
|----------------------------|---------------------------------------------------------------|-----|
| S.bicolor_Sb06g026350      | SF-RQVVGTYATEARALALRLLEAISESLGLERSHMR-AMG---- <td>210</td>    | 210 |
| Z.mays_GRMZM2G050234       | SF-RQVVGTYATEARALALRLLEAISESLGLERSHMA-AMG---- <td>210</td>    | 210 |
| G.max_Glyma03g42250        | SLSRQVDAEYCRKMRGVSLSKLVEAISESLGLERDYINR-VVGGKKGQEQQHLAMNYYPAC | 213 |
| G.max_Glyma16g01990        | SF-REDVAEYSRKMRGLSLKLLEAISESLGLEKDYIDK-ALG---- <td>207</td>   | 207 |
| G.max_Glyma07g05420        | SF-REDVAEYSRKMRGLSLKLLEAISESLGLERDYIDK-ALG---- <td>207</td>   | 207 |
| <b>VvDLO1</b>              | SF-REVVAEYCKEARKLALLLLEAISESLGLERNHIDK-ALG---- <td>208</td>   | 208 |
| R.communis_30076.t000026   | SF-REDVGEYCRNVRDLAVRLLEAISESLGLERDYINK-ALD---- <td>208</td>   | 208 |
| AlDLO1                     | SF-KEVTAEYATSVRALVLRLLLEAISESLGLES DHISN-ILG---- <td>210</td> | 210 |
| AtDLO1                     | SF-REVTAEYATSVRALVLRLLLEAISESLGLES DHISN-ILG---- <td>209</td> | 209 |
| AlDLO2                     | SF-REVTAEYATSVRALVLTLLLEAISESLGLVKDRVSN-TLG---- <td>210</td>  | 210 |
| AtDLO2                     | SF-REVTAEYATSVRALVLTLLLEAISESLGLAKDRVSN-TIG---- <td>207</td>  | 207 |
| C.sativus_Cucsa.193360     | SF-RKEVAEYCTTMRQLTLKLLEAISESLGLPKDSIAN-SIG---- <td>211</td>   | 211 |
| C.papaya_evm.TU.sup_37.106 | FF-REDVAEYCSIRGLVLKLVEAISESLGLGGDYINK-VLG---- <td>208</td>    | 208 |
| E.grandis_v1_0.017927m.g   | SF-RKEVGEYCTRVRELALKLLEAISESLGLEREYISK-NLG---- <td>210</td>   | 210 |
| E.grandis_v1_0.017897m.g   | SF-RKEVGEYCTRVRELALKLLEAISESLGLEREYISK-NLG---- <td>210</td>   | 210 |
| E.grandis_v1_0.047536m.g   | SF-RKEVGEYCTRVRELVFLLLEAISESLGLEREYISQ-NLG---- <td>233</td>   | 233 |
| E.grandis_v1_0.017895m.g   | SF-RKEVGEYCTRVRELVLKLLEAISESLGLEREYISQ-NLG---- <td>210</td>   | 210 |
| E.grandis_v1_0.017876m.g   | SF-RKEMGEYCTRVRELVLKLLEAISESLGLEREYISQ-NLG---- <td>210</td>   | 210 |
| E.grandis_v1_0.015926m.g   | SF-RKEVGEYCTRVRELVFLLLEAISESLGLEREYISQ-NLG---- <td>210</td>   | 210 |
| <b>VvDLO2</b>              | SF-REDVAEYCTSIRALVLRLLLETISESLGLEKNYVSG-VLG---- <td>209</td>  | 209 |
| C.clementina_0.9_014263m.g | SF-REDVGDYCTSVRGLVLRLLIQAISESLGLPSDYIDKEALG---- <td>214</td>  | 214 |
| P.persica_ppa008100m.g     | SF-REQVGEYCTTVRGLVLRLLGAIASESLGLEKNYIVE-ALG---- <td>208</td>  | 208 |
| P.persica_ppa008091m.g     | SF-REQVGEYCTTVRGLVLRLLGAIASESLGLEKNYIVE-ALG---- <td>208</td>  | 208 |
| R.communis_30068.t000102   | LF-RKNVSEYSTSVRRLVLTLLLEAISESLGLKRDYIEK-TLS---- <td>207</td>  | 207 |
| M.esculenta_4.1_029834m.g  | SF-RKNVAEYCTRVRGLVLTLLLEAISESLGLKSDYIDK-ALS---- <td>208</td>  | 208 |

. : \* . \* . \* :

**DMR6**

|                            |                                                               |     |
|----------------------------|---------------------------------------------------------------|-----|
| B.distachyon_Bradi5g19240  | PEPDLTYGLPKHTDPNALTVLLQDPNVSGLQVLKDG-QWIAVDPRPNALVINLGDQLQ--  | 257 |
| O.sativa_Os04g49194        | PEPDLTYGLPKHTDPNALTILLPDPHVAGLQVLRDGDQWIVVNPRPNALVVNLGDQIQ--  | 259 |
| O.sativa_Os10g39140        | PEPELTYGLPAHTDPNALTILLMDQVAGLQVLNDG-KWIAVNPQPGALVINIGDQLQ--   | 262 |
| S.bicolor_Sb01g030560      | PEPELTYGLPAHTDPNALTILLMDQDVAGLQVLHGG-KWVAVNPQPGALIINIGDQLQ--  | 256 |
| ZmFNSI-1/ZmDMR6            | PEPELTYGLPAHTDPNALTILLMDPDVAGLQVLHAG-QWVAVNPQPGALIINIGDQLQ--  | 256 |
| B.distachyon_Bradi1g77040  | PSPELTYGLPAHTDPNALTILLMDEQVAGLQVLKDG-QWIAVNPRPNALVVNLGDQLQ--  | 256 |
| O.sativa_Os03g03034        | PEPELTFGLPAHTDPNALTILLMDQQVAGLQVLKEG-RWIAVNPQPNALVINIGDQLQ--  | 256 |
| S.italica_Si036512m.g      | PAPELTYGLPAHTDPNALTILLMDQQVAGLQVLNDG-RWIAVNPRPNALVINIGDQLQ--  | 256 |
| S.bicolor_Sb01g049030      | PAPELTYGLPAHTDPNALTILLMDQQVAGLQVLKDG-RWIAVNPRPGALVVNLGDQLQ--  | 256 |
| Z.mays_GRMZM2G475380       | PAPELTYGLPAHTDPNALTILLMDQQVAGLQVLKDG-RWIAVNPRPGALVVNLGDQLQVT  | 258 |
| A.coerulea_v1.008143m.g    | PEPELTYGLPRHTDPNTITILLQGGQVAGLQVLHNG-KWVAVNPYPNAFVVNLGDQIQ--  | 258 |
| E.salsugineum_TP2g22820    | PEPELTYGLPAHTDPNVLTILLQDATVCGLQILIDG-HWFAVNPRPDAFVINIGDQLQ--  | 257 |
| C.rubella_006g21660        | PEPELTYGLPAHTDPNALTILLQDSTVCGLQILIDG-QWFAVNPHPNAFVINIGDQLQ--  | 257 |
| AtDMR6                     | PEPELTYGLPAHTDPNALTILLQDTTVCGLQILIDG-QWFAVNPHPNAFVINIGDQLQ--  | 257 |
| AlDMR6                     | PEPELTYGLPAHTDPNALTILLQDTTVCGLQILIDG-QWFAVNPHPNAFVINIGDQLQ--  | 257 |
| C.sativus_Cucsa.273300     | POPELTYGLPGHTDPNALTILLQDLHVAGLQVLKDG-KWLAVNPHPNAFVINIGDQLQ--  | 245 |
| SlDMR6                     | POPELTYGLPAHTDPNSLTILLQDLQVAGLQVLKDG-KWLAVKPQPDFAFVINLGDQLQ-- | 257 |
| M.guttatus_mgv1a009622m.g  | PEPELTYGLPAHTDPNALTILLQDLQVAGLQVLKDG-KWLAIKPQPGAFVINIGDQLQ--  | 256 |
| VvDMR6.1 (I253K)           | POPELTYGLPGHTDPNALTILLQDLRVAGLQVLKDG-TWLAIKPHPGAFVVNLGDQLQ--  | 258 |
| C.papaya_16416436          | POPELTYGLPAHTDPNALTILLQDLQVSGLQVLKDG-KWVAVHPQPNAFVINIGDQLQ--  | 257 |
| VvDMR6.2                   | PEPELTYGLPAHTDPNALTILLQDSHVAGLQVLKDG-KWVAVKPHPGAFVVNLGDQLQ--  | 257 |
| R.communis_29866.t000021   | POPDLTYGLPGHTDPNALTILLQDLQVAGLQVFKDG-KWLAVNPHPNAFVINLGDQLQ--  | 257 |
| M.truncatula_Medtr3g122530 | POPELTYGLPGHTDPNALTILLQDLHVAGLQVLKDG-KWLAINPIPDFAFVINIGDQLQ-- | 257 |
| G.max_Glyma04g227900       | PEPELTYGLPGHTDPNALTILLQDLQVCGLQVLKNG-KWLAVNPQPNAFVINIGDQLQ--  | 257 |
| G.max_Glyma06g137000       | PEPELTYGLPGHTDPNALTILLQDLQVAGLQVLKDG-KWLAVSPQPNAFVINIGDQLQ--  | 257 |
| G.max_Glyma06g14190        | PEPELTYGLPGHTDPNALTILLQDLQVAGLQVLKDG-KWLAVSPQPNAFVINIGDQLQ--  | 257 |
| E.grandis_v1_0.018520m.g   | PEPELTYGLPGHTDPNALTILLQDPHVAGLQVLKDG-KWVAIDPHPNAFVINIGDQLQ--  | 257 |
| E.grandis_v1_0.018494m.g   | PEPELTYGLPGHTDPNALTILLQDLHVAGLQVLKDG-KWVAIDPHPNAFVINIGDQLQ--  | 257 |
| E.grandis_v1_0.018496m.g   | PEPELTYGLPGHTDPNALTILLQDLHVAGLQVLKDG-KWVAIDPHPNAFVINIGDQLQ--  | 257 |
| P.persica_ppa008269m.g     | POPELTYGLPGHTDPNALTILLQDLEVAGLQVLKDG-KWIAVNPHPNAFVINLGDQLQ--  | 257 |
| C.clementina_0.9_015118m.g | PEPELTYGLPGHTDPNALTILLQDLEVAGLQVLKDD-KWVAVNPLPNAFVINIGDQLQ--  | 257 |
| P.persica_ppa022381m.g     | HQPELTYGLPGHADPNVVTLLQD-DVAGLQVFNNG-RWVAVKMPHTFIVNIGDQIQ--    | 261 |
| P.persica_ppa019415m.g     | HQPELTYGLPGHADPNVVTLLQD-DVAGLQVFNNG-RWVAVKMPHTFIVNIGDQIQ--    | 261 |
| C.clementina_0.9_032642m.g | POPDLTYGLPGHIDPNLITVLLQD-DVPGLQVLRKG-KWLPVSPIPNTFIVKIGDMQ--   | 259 |
| C.clementina_0.9_012078m.g | POPDLTYGLPGHTDPNLITVLLQD-DVPGLQVLRNG-KWLPVSPIPNTFIVNIGDMQ--   | 265 |

**DLO**

|                           |                                                              |     |
|---------------------------|--------------------------------------------------------------|-----|
| B.distachyon_Bradi5g19250 | POPELTYGLPGHKDPNAVTLLLQD-GVSGLQVQRGG-RWVAVNPVPNALVINIGDQLQ-- | 266 |
| O.sativa_Os04g49210       | POPELTYGLPGHKDPNAITLLQD-GVSGLQVQRNG-RWVAVNPVPDALVINIGDQIQ--  | 266 |
| S.italica_Si010491m.g     | POPELTYGLPGHKDPNAITLLQD-GVSGLQVQRDG-RWVAVNPVPNALVINIGDQLQ--  | 266 |



|                            |                                                              |     |
|----------------------------|--------------------------------------------------------------|-----|
| S.bicolor_Sb06g026350      | PQPELTYGLPGHKDPNAITLLLQD-GVSGLQVQGG-RWVAVNPVPDALVINIGDQM--   | 266 |
| Z.mays_GRMZM2G050234       | PQPELTYGLPGHKDPNAITLLLQD-GVSGLQVQGG-RWVAVNPVPNALVINIGDQM--   | 266 |
| G.max_Glyma03g42250        | PEPELTYGLPGHTDPTVITILLQD-EVPGLQVLKDG-KWVAVNPIPNTFVVNVGDQIQ-- | 269 |
| G.max_Glyma16g01990        | PEPELTYGLPAHADPNAITILLQN-QVPGLQVLHDG-KWLTVPNPNTFIVNIADQIQ--  | 263 |
| G.max_Glyma07g05420        | PEPELTYGLPAHADPNAITILLQN-EVPGLQVLYDG-KWLTVPNPNTFIVNIGDQIQ--  | 263 |
| <b>VvDLO1</b>              |                                                              |     |
| R.communis_30076.t000026   | PQPELTFGLPGHADPNALTILLQD-DVPGLQVLKDG-KWVAIHPIPTFIVNIGDQIQ--  | 264 |
| AlDLO1                     | PQPELTYGLPVHADPNVITILLQD-DVPGLQVLKDG-KWVAVSPVPHTFIVNIGDQIQ-- | 264 |
| AtDLO1                     | PEPELTYGLPGHKDPTVITVLLQD-QVSGLQVFKDN-KWVAVNPIPNTFIVNIGDQM--  | 266 |
| AlDLO2                     | PEPELTYGLPGHKDPTVITVLLQD-QVSGLQVFKDD-KWVAVSPIPTFIVNIGDQM--   | 265 |
| AtDLO2                     | PQPELTYGLPGHKDANLITVLLQD-EVSGLQVFEDG-KWIAVNPIPNTFIVNLGDQM--  | 266 |
| C.sativus_Cucsa.193360     | PQPELTYGLPGHKDANLITVLLQD-EVSGLQVFKDG-KWIAVNPVPNTFIVNLGDQM--  | 263 |
| C.papaya_evm.TU.sup_37.106 | PQPDLYGLPCHTDPNLITLLLQD-QVPGLQVHRDG-AWVALNPIPNTFIINIGDQM--   | 267 |
| E.grandis_v1_0.017927m.g   | PEPELTYGLPGHTDPNLITVLLQD-DVPGLQVLRNG-KWVAVNPIPNTFIINIGDQM--  | 264 |
| E.grandis_v1_0.017897m.g   | PQPELTYGLPGHTDQNLITILLQD-EVPGLQVLRDG-KWIAVNPIPNTFIVNIGDQM--  | 266 |
| E.grandis_v1_0.047536m.g   | PQPELTYGLPGHTDNLITILLQD-DVPGLQVLRDG-KWIAVNPIPNTFIVNIGDQM--   | 266 |
| E.grandis_v1_0.017895m.g   | PQPELTYGLPSHTDPNLITILLQD-DVPGLQVLRNG-KWVAVNPIPNTFIVNIGDQM--  | 289 |
| E.grandis_v1_0.017895m.g   | PQPELTYGLPGHTDPNLITILLQD-DVPGLQVLRNG-KWVAVNPIPNTFIVNIGDQM--  | 266 |
| E.grandis_v1_0.017876m.g   | PQPELTYGLPGHTDPNLITILLQD-DVPGLQVLRNG-KWVAVNPIPNTFIVNIGDQM--  | 266 |
| E.grandis_v1_0.015926m.g   | PQPELTYGLPGHTDPNLITILLQD-DVPGLQVLRNG-KWVAVNPIPNTFIVNIGDQM--  | 266 |
| <b>VvDLO2</b>              |                                                              |     |
| C.clementina_0.9_014263m.g | PQPELTYGLPGHTDCSLITVLLQD-DVPGLQVLRNG-KWVSVNPIPNSFIVNIGDHMQ-- | 265 |
| P.persica_ppa008100m.g     | PQPELTYGLPGHTDPNLITLLLQD-DVPGLQVLRDG-NWVPVNPPISTFIVNIGDQM--  | 270 |
| P.persica_ppa008091m.g     | PEPELTYGLPGHTDCNLITILLQD-DVAGLQVLRNG-KWVAVNPIPNTFIVNIGDMMQ-- | 264 |
| R.communis_30068.t000102   | PEPELTYGLPGHTDCNLITILLQD-DVAGLQVLRNG-KWVAVNPIPNTFIVNIGDMMQ-- | 264 |
| M.esculenta_4.1_029834m.g  | PQPELTYGLPGHTDPNLITILLQD-HVPGLQVLRNG-KWIAINPISTFIVNIGDQM--   | 263 |
|                            | PQPELTYGLPEHSDPNLITILLQD-QVPGLQVLRNG-KWVAVDPIPTFIVNIGDQM--   | 264 |

\*:\*\*\*:\*\*\* \* \* . :\*:\*\* . \* \*\*\*: . \*. : \* \* :::::.\* :\*



**DMR6**

|                            |                                                             |     |
|----------------------------|-------------------------------------------------------------|-----|
| B.distachyon_Bradi5g19240  | -----ALSNGAYKSVWHRAVVNAAQERMSVASFLCPC                       | 289 |
| O.sativa_Os04g49194        | -----ALSNDAYKSVWHRAVVNPVQERMSVASFMCP                        | 291 |
| O.sativa_Os10g39140        | -----ALSNGKYRSVWHRAVVNSDRERMSVASFLCPC                       | 294 |
| S.bicolor_Sb01g030560      | -----ALSNGQYRSVWHRAVVNSDRERMSVASFLCPC                       | 288 |
| ZmFNSI-1/ZmDMR6            | -----ALSNGQYRSVWHRAVVNSDRERMSVASFLCPC                       | 288 |
| B.distachyon_Bradilg77040  | -----ALSNGRYKSVWHRAVVNSDRPRMSIASFMCP                        | 288 |
| O.sativa_Os03g03034        | -----ALSNGRYKSVWHRAVVNSDKARMSVASFLCPC                       | 288 |
| S.italica_Si036512m.g      | -----ALSNGRYKSVWHRAVVNSDRPRMSVASFLCPC                       | 288 |
| S.bicolor_Sb01g049030      | -----ALSNGRYKSVWHRAVVNSDRPRMSVASFLCPC                       | 288 |
| Z.mays_GRMZM2G475380       | CSCIALPLFPFPHLLSAPGLHYCTAPAQALSNGRYRSVWHRAVVNADPRMSVASFLCPC | 318 |
| A.coerulea_v1.008143m.g    | -----ALSNGNYASVWHRATVNTDRERISVASFLCPA                       | 290 |
| E.salsugineum_TP2g22820    | -----ALSNGVYKSVWHRAVTNTDKPRLSVASFLCPA                       | 289 |
| C.rubella_006g21660        | -----ALSNGVYKSVWHRAVTNTENPRLSVASFLCPA                       | 289 |
| AtDMR6                     | -----ALSNGVYKSVWHRAVTNTENPRLSVASFLCPA                       | 289 |
| AlDMR6                     | -----ALSNGVYKSVWHRAVTNTENPRLSVASFLCPA                       | 289 |
| C.sativus_Cucsa.273300     | -----ALSNGVYKSVWHRAVVNVDPRLSVASFLCPC                        | 277 |
| SlDMR6                     | -----AVSNGKYRSVWHRATIVNSDQARMSVASFLCPC                      | 289 |
| M.guttatus_mgvla009622m.g  | -----ALSNGKYKSVWHRAVVNADKARLSVASFLCPC                       | 288 |
| VvDMR6.1                   | -----AVSNGKYKSVWHRAVVNAESERLSVASFLCPC                       | 290 |
| C.papaya_16416436          | -----AVSNGKYKSVWHRAVVNSDKVRLSIASFLCPC                       | 289 |
| VvDMR6.2                   | -----ALSNGKYRSVWHRATVNVGKARMSIASFLCPS                       | 289 |
| R.communis_29866.t000021   | -----ALSNGRYKSVWHRATIVNADREMSIASFLCPC                       | 289 |
| M.truncatula_Medtr3g122530 | -----ALSNGLYKSVWHRATIVNAEKPRLSVASFLCPD                      | 289 |
| G.max_Glyma04g227900       | -----ALSNGLYKSVWHRAVVNVEKPRLSVASFLCPN                       | 289 |
| G.max_Glyma06g137000       | -----ALSNGLYKSVWHRAVVNVEKPRLSVASFLCPN                       | 289 |
| G.max_Glyma06g14190        | -----ALSNGLYKSVWHRAVVNVEKPRLSVASFLCPN                       | 289 |
| E.grandis_v1_0.018520m.g   | -----ALSNGRYKSVWHRATIVNADKPRMSIASFLCPS                      | 289 |
| E.grandis_v1_0.018494m.g   | -----ALSNGRYKSVWHRATIVNADKPRMSIASFLCPS                      | 289 |
| E.grandis_v1_0.018496m.g   | -----ALSNGRYKSVWHRATIVNADKPRMSIASFLCPS                      | 289 |
| P.persica_ppa008269m.g     | -----ALSNGIYRSVWHRAITNTDRARLSVASFLCPQ                       | 289 |
| C.clementina_0.9_015118m.g | -----ALSNGRYKSVWHRATIVNAEKARMSVASFLCPN                      | 289 |
| P.persica_ppa022381m.g     | -----VVSNDRYKSVLHRAVVNCDKERISIPTYCPS                        | 293 |
| P.persica_ppa019415m.g     | -----VVSNDRYKSVLHRAVVNCDKERISIPTYCPS                        | 293 |
| C.clementina_0.9_032642m.g | -----VLSNDRYKSVLHRAVVNCDKERISIPTYCPS                        | 291 |
| C.clementina_0.9_012078m.g | -----VLSNDRYKSVLHRAVVNCDKERISIPTYCPS                        | 297 |

**DLO**

|                           |                                      |     |
|---------------------------|--------------------------------------|-----|
| B.distachyon_Bradi5g19250 | -----ALSNDRYKSVLHRVIVNSESERISVPTYCPS | 298 |
| O.sativa_Os04g49210       | -----ALSNDRYKSVLHRVIVNSESERISVPTYCPS | 298 |
| S.italica_Si010491m.g     | -----ALSNDRYKSVLHRVIVNSESERISVPTYCPS | 298 |

|                            |       |                                   |     |
|----------------------------|-------|-----------------------------------|-----|
| S.bicolor_Sb06g026350      | ----- | ALSNDRYKSVLHRVIVNSESERISVPTFFYCPS | 298 |
| Z.mays_GRMZM2G050234       | ----- | ALSNDRYKSVLHRVIVNSESERISVPTFFYCPS | 298 |
| G.max_Glyma03g42250        | ----- | VISNDKYKSVLHRAVVCNKDRISIPTFFYFPS  | 301 |
| G.max_Glyma16g01990        | ----- | VISNDRYKSVLHRAVNCCKERMISIPTFFYCPS | 295 |
| G.max_Glyma07g05420        | ----- | VISNDRYKSVLHRAVNCCKERMISIPTFFYCPS | 295 |
| <b>VvDLO1</b>              | ----- | VLSNDCYKSAVHRAVVCQKERISIPTFFYCPS  | 296 |
| R.communis_30076.t000026   | ----- | VISNDRYKSVLHRAVVNSNKERISIPTFFYCPS | 296 |
| AlDLO1                     | ----- | VISNDKYKSVLHRAVVNTEKERLSIPTFFYFPS | 298 |
| AtDLO1                     | ----- | VISNDKYKSVLHRAVVNTENERLSIPTFFYFPS | 297 |
| AlDLO2                     | ----- | VISNDKYKSVLHRAVVNIDKERISIPTFFYCPS | 298 |
| AtDLO2                     | ----- | VISNEKYKSVLHRAVVNSDMERISIPTFFYCPS | 295 |
| C.sativus_Cucsa.193360     | ----- | VLSNDRYKSVLHRAVVNNATERISIPTFFYCPS | 299 |
| C.papaya_evm.TU.sup_37.106 | ----- | VISNDKYKSVVHRAVVNSERERISIPTFFYCPS | 296 |
| E.grandis_v1_0.017927m.g   | ----- | VISNDKYKSVLHRAVVNCDRERISIPTFFYCPS | 298 |
| E.grandis_v1_0.017897m.g   | ----- | VISNDKYKSVLHRAVVNCDRERISIPTFFYCPS | 298 |
| E.grandis_v1_0.047536m.g   | ----- | VISNDKYKSVLHRAVVNNTERISIPTFCCPS   | 321 |
| E.grandis_v1_0.017895m.g   | ----- | VISNDKYKSVLHRAVVNCNTERISIPTFFYCPS | 298 |
| E.grandis_v1_0.017876m.g   | ----- | VISNDKYKSVLHRAVVNCNTERISIPTFFYCPS | 298 |
| E.grandis_v1_0.015926m.g   | ----- | VISNDKYKSVLHRAVVNCNTERISIPTFFYCPS | 298 |
| <b>VvDLO2</b>              | ----- | VISNDRYKSVLHRAVVNCNKDRISIPTFFYCPS | 297 |
| C.clementina_0.9_014263m.g | ----- | VLSNDRYKSVLHRAVVSVDKERISIPTFFYCSS | 302 |
| P.persica_ppa008100m.g     | ----- | VISNDKYKSVLHRAVVNCNSERISIPTFFYCPS | 296 |
| P.persica_ppa008091m.g     | ----- | VISNDKYKSVLHRAVVNCNSERISIPTFFYCPS | 296 |
| R.communis_30068.t000102   | ----- | VISNDRYKSVLHRAVVNSYEERISIPTFFYCPS | 295 |
| M.esculenta_4.1_029834m.g  | ----- | VISNNYKSVLHRAVVNSDKERLSIPTFFYCPS  | 296 |

.:\*\*\* \* \* \*\* . . . \*:\*: :\*

**DMR6**

|                            |                                                                |     |
|----------------------------|----------------------------------------------------------------|-----|
| B.distachyon_Bradi5g19240  | NSAVIGPAAKLVGD---GDEPVYRSYTYDEYYNKFWSRN-LDQEHCLLELFRGQK----    | 339 |
| O.sativa_Os04g49194        | NSAVISPAARKLVAD---GDAPVYRSFTYDEYYKKFWSRN-LDQEHCLLELFRGQ-----   | 340 |
| O.sativa_Os10g39140        | NSVELGPAKKLITD---DSPAVYRNYTYDEYYKKFWSRN-LDQEHCLLELFR-----      | 342 |
| S.bicolor_Sb01g030560      | NHVVLGPAKKLVTE---DTPAVYRSYTYDEYYKKFWSRN-LDQEHCLLELFR-----      | 336 |
| ZmFNSI-1/ZmDMR6            | NHVVLGPAKKLVTE---DTPAVYRNYTYDKYYAKFWSRN-LDQEHCLLELFR-----      | 336 |
| B.distachyon_Bradilg77040  | NSVVLGPAEKLVDG---ASPAVYRNYTYDEYYKKFWSRN-LDQEHCLLELFR-----      | 336 |
| O.sativa_Os03g03034        | NDVLIGPAQKLITD---GSPAVYRNYTYDEYYKKFWSRN-LDQEHCLLELFRTPPTDTS    | 342 |
| S.italica_Si036512m.g      | NDVRIGPAAKLVGE---GAPAVYRDYTYAEYYGKFWSRN-LDQEHCLLELFR-----      | 336 |
| S.bicolor_Sb01g049030      | NDVRIGPAAKLVTE---DTPAVYRDYTYAEYYAKFWSRN-LDQEHCLLELFR-----      | 336 |
| Z.mays_GRMZM2G475380       | NDARIGPAARLLTD---GTPAVYRDYTYAEYYAKFWSRN-LDQEHCLLELFRTPTS---    | 369 |
| A.coerulea_v1.008143m.g    | NDAIICPAV-----KDGSPSMYKKFTYDEYYKKFWSGN-LDQOHCLELFRKE-----      | 335 |
| E.salsugineum_TP2g22820    | DCAVISPAKPLWEDEDEAKPMYRDYTYAEYYKKFWSRN-LDQEHCLLENFLNH-----     | 341 |
| C.rubella_006g21660        | DCAVMSPAKSLWEAEDSETKPIYRDFTYAEYYKKFWSRN-LDQEHCLLENF-----       | 338 |
| AtDMR6                     | DCAVMSPAKPLWEAEDDETKPVYKDFTYAEYYKKFWSRN-LDQEHCLLENFLNN-----    | 341 |
| AlDMR6                     | DCAVMSPAKPLWEAEDNETKPVYRDFTYAEYYKKFWSRN-LDQEHCLLEYFRNN-----    | 341 |
| C.sativus_Cucsa.273300     | DDALITPAPLLSQ---PSPIYRPFTYAQYNTFWNRN-LDQOHCLELFRKNHPP---       | 326 |
| SlDMR6                     | DSAKISAPKLLTED---GSPVIYQDFTYAEEYNNKFWSRN-LDQOHCLELFRKN-----    | 337 |
| M.guttatus_mgvla009622m.g  | DSANISAPKGLTGG---EDPAVYRDYTYNEYYKKFWSRN-LDQEHCLLELFRKN-----    | 336 |
| VvDMR6.1                   | NDAVIGPAKPLTED---GSAPIYKNFTYAEEYKKFWGRD-LDQEHCLLELFRKN-----    | 338 |
| C.papaya_16416436          | DDAVISPPKLLTAD---GSVAIYRDFTYAEYYKKFWSRN-LDQEHCLLELFRNK-----    | 338 |
| VvDMR6.2                   | DDALISPARALTDE---GSAAIYRSFTYAEEYKKFWSRN-LDQEHCLEVFRKN-----     | 337 |
| R.communis_29866.t000021   | DDALISPAKPLTEG---ESGAVYRDFTYAEYYKKFWSRN-LDQEHCLLELFRKN-----    | 337 |
| M.truncatula_Medtr3g122530 | NEALICPAKPLTED---GSGAVYRGFTYPEYYSKFWSRD-LEKEHCLEFFKNN-----     | 338 |
| G.max_Glyma04g227900       | DEALISPAKPLTEG---GSEAIYRGFTYAEEYKKFWSRN-LDQEHCLEFFKKNK-----    | 338 |
| G.max_Glyma06g137000       | DEALISPAKPLTEH---GSEAVYRGFTYAEEYKKFWSRN-LDQEHCLLELFRKNK-----   | 338 |
| G.max_Glyma06g14190        | DEALISPAKPLTEH---GSEAVYRGFTYAEEYKKFWSRN-LDQEHCLLELFRKNK-----   | 338 |
| E.grandis_v1_0.018520m.g   | NDALISSPVSLLDN---GCGPTYRDFTYAEYYKKFWSRN-LDQEHCLLELFRKNQA----   | 339 |
| E.grandis_v1_0.018494m.g   | DDALISSPVSLLDN---GCGPTYRDFTYAEYYKKFWSRN-LDQEHCLLELFRKNQA----   | 339 |
| E.grandis_v1_0.018496m.g   | DDALISSPVSLLDN---GCGPTYRDFTYAEYYKKFWSRN-LDQEHCLLELFRKNQA----   | 339 |
| P.persica_ppa008269m.g     | DDALISPAKALTDD---GSAAIYRGYTYTEYYKKFWTRD-LNQEHCLELFRKTDQ----    | 339 |
| C.clementina_0.9_015118m.g | NDAMISPPKALTED---GSGAVYRDFTYAEYYSKFWSRN-LDQEHCLLELFRKN-----    | 337 |
| P.persica_ppa022381m.g     | YDAVMEPAPQLVDD---H-HPPLYRSFTYAEEFYEFKFWDRG-LNTRSSLDLFRQTSHA--  | 345 |
| P.persica_ppa019415m.g     | YDAVMEPAPQLVDD---H-HPPLYRSFTYAEEFYEFKFWDRG-LNTRSSLDLFRKTTSHA-- | 345 |
| C.clementina_0.9_032642m.g | PDAVIAPAKDLIDER---HP-----KFWNRG-LVDECCLDLFRKASTA---            | 329 |
| C.clementina_0.9_012078m.g | PDAVIAPAKDLIDER---HPAVYKNFTYAEEYQKFWNRG-L-DEKCLDLFRKASTA---    | 347 |

**DLO**

|                           |                                                              |     |
|---------------------------|--------------------------------------------------------------|-----|
| B.distachyon_Bradi5g19250 | PDAVVAPAEALVDG---S-HPLAYRPFTTYQEEYEFWNMG-LESASCLDRFRPMD----  | 348 |
| O.sativa_Os04g49210       | PDAVIAPAGALVDGA-L-HPLAYRPFKYQAYYDEFWNMG-LQSASCLDRFRPNDQAV--  | 352 |
| S.italica_Si010491m.g     | PDAVIAPAGALVDD---A-HPLAYRPFTTYQEEYDEFWNMG-LQSASCLDRFRPG----- | 347 |



|                            |                                                             |     |
|----------------------------|-------------------------------------------------------------|-----|
| S.bicolor_Sb06g026350      | PDGVIAPADALVDD--A-HPLAYRPFTYQ EYYDEFWNMG-LQSASCLDRFRPGGSIE- | 351 |
| Z.mays_GRMZM2G050234       | PDAVIAPADALVDD--G-HPLAYRPFTYQ EYYDAFWNMG-LQSASCLDRFRPGGSLE- | 351 |
| G.max_Glyma03g42250        | NDAIIGPAPQLIHGH-H-HPPQYNNFTYNEYYQNFWRNG-LSKETCLDIFKA-----   | 350 |
| G.max_Glyma16g01990        | PDALIKPAPQLVDK--E-HPAQYTNFTYREYYDKFWIRG-LSKETCVDMFKAQD----  | 345 |
| G.max_Glyma07g05420        | PDALIKPAPKLVDN--E-HPAQYTNFTYREYYDKFWNRG-LSKETCVDMFKAQD----  | 345 |
| <b>VvDLO1 (G302E)</b>      | PDAVIGPAPGLVDH--G-HPALYRKFTYSEYFGKFWNRG-LATQSCLDMFKT-----   | 344 |
| R.communis_30076.t000026   | PDAAGPAPPLVDN--H-HPLLYTNFTYSQYYHKFWNRG-LATHCLDMFKK-----     | 344 |
| AlDLO1                     | TDAVIGPAHELIN EQ-E-SLAVYRTFFVEYWDKFWNRG-LATASCLDAFKASTT---  | 350 |
| AtDLO1                     | TDAVIGPAHELIN EQ-D-SLAIYRTYFFVEYWDKFWNRG-LATASCLDAFKAPTT--- | 349 |
| AlDLO2                     | EDAMIGPAQELINEE-EDSHAIYRNFTYA EYFEKFWDTA-FATESCIDSFKASTA--- | 351 |
| AtDLO2                     | EDAVISPAQELINEE-EDSPAIRNFTYA EYFEKFWDTA-FATESCIDSFKASTA---  | 348 |
| C.sativus_Cucsa.193360     | PEAMIGPAKELIHDE---HRPAFRNFTYSEYYQTFWSGE-LDTRRCLDLFRI-----   | 347 |
| C.papaya_evm.TU.sup_37.106 | LDAVIGPAH-----RPSVYRNFSYGEYYSKFWSRSSLTAAQACLDMFKA-----      | 339 |
| E.grandis_v1_0.017927m.g   | PEALIGPAQGLIDHD---NPAVYRSFTY EYYHKFWNRG-LRTECCLDMFKIPSA---  | 349 |
| E.grandis_v1_0.017897m.g   | PEALIGPAQGLIDHE---HPAVYRSFTY EYYHKFWNRG-LRTECCLDMFKIPSA---  | 349 |
| E.grandis_v1_0.047536m.g   | PEGLIQPAQGLIDHE---HPPVYRSFTWE EYQKFYHRG-LRTECCLDMFKIPSA---  | 372 |
| E.grandis_v1_0.017895m.g   | PEGLIRPAQGLIDHE---HPAVYKSFTY EYYHKFWNRG-LRTECCLDMFKIHSA---  | 349 |
| E.grandis_v1_0.017876m.g   | PEGLIRPAQGLIDHE---HPAVYRSFTY EYYHKFWNRG-LRTECCLDMFKIHSA---  | 349 |
| E.grandis_v1_0.015926m.g   | PEGLIRPAQGLIDHG---HPAVYRSFTY EYYHKFWNRG-LRTECCLDMFKIPSA---  | 349 |
| <b>VvDLO2</b>              | PDAVIGPSP ELVDDD---HPAVYRNFTCEEYYTQFWNRG-LATESCLDTFKASTT--- | 348 |
| C.clementina_0.9_014263m.g | PDAVIGPAKGLVDQD---HPAVYRDFTYA EYKFWNRG-LATECCLEMFKASSTV---  | 354 |
| P.persica_ppa008100m.g     | PDAVIGPAKDLISHD---QPAMYRNFTYA EYFEKFWNRG-LATECCLDLFKPN----- | 345 |
| P.persica_ppa008091m.g     | PDAVIGPAKDLISHD---QPAMYRNFTYA EYFEKFWNRG-LATECCLDLFKPN----- | 345 |
| R.communis_30068.t000102   | PDAVIGPAKDLIDPD---HPAAYREFTYA EYKFWDRG-LAKECCLDLFKTSTA---   | 346 |
| M.esculenta_4.1_029834m.g  | SDAVIGPAKDLIDND---HPAVYKHFTYA EYEIFWNRG-LEKECCLDLFKISSA---  | 347 |
|                            | : * : : . : : *                                             |     |
